# Supplementary material for: Competition influences tree growth, but not mortality, across environmental gradients in Amazonia and tropical Africa
Source: PubMed Central journal article supplement (PMC7379300; doi:10.1002/ecy.3052), 2020-05-05
Supplement: ECY-101-e03052-s003.pdf [file ECY-101-e03052-s003.pdf]

**Supporting Information.** Rozendaal, D.M.A., O.L. Phillips, S.L. Lewis, K. Affum-Baffoe, E. Alvarez Dávila, A. Andrade, L.E.O.C. Aragão, A. Araujo-Murakami, T.R. Baker, O. Bánki, R.J.W. Brienen, J.L.C. Camargo, J.A. Comiskey, M.N. Djuikouo K., S. Fauset, T.R. Feldpausch, T.J. Killeen, W.F. Laurance, S.G.W. Laurance, T. Lovejoy, Y. Malhi, B.S. Marimon, B.-H. Marimon Junior, A.R. Marshall, D.A. Neill, P. Núñez Vargas, N.C.A. Pitman, L. Poorter, J. Reitsma, M. Silveira, B. Sonké, T. Sunderland, H. Taedoumg, H. ter Steege, J.W. Terborgh, R.K. Umetsu, G.M.F. van der Heijden, E. Vilanova, V. Vos, L.J.T. White, S. Willcock, L. Zemagho, and M.C. Vanderwel. 2020. Competition influences tree growth, but not mortality, across environmental gradients in Amazonia and tropical Africa. *Ecology*.

## Appendix S1

**Table S1. List of included plots.**

| Continent | Country | Plot name                              | Plot code | Trees mapped / subplots | Plot area (ha) | Latitude | Longitude |
|-----------|---------|----------------------------------------|-----------|-------------------------|----------------|----------|-----------|
| Amazon    | Bolivia | BEEM plot 5                            | BEE-05    | mapped                  | 1              | -16.5    | -64.6     |
| Amazon    | Bolivia | Chore 1                                | CHO-01    | 0.04 ha subplots        | 1              | -14.4    | -61.1     |
| Amazon    | Bolivia | Cerro Pelao 1                          | CRP-01    | 0.04 ha subplots        | 1              | -14.5    | -61.5     |
| Amazon    | Bolivia | Cerro Pelao 2                          | CRP-02    | mapped                  | 1              | -14.5    | -61.5     |
| Amazon    | Bolivia | Huanchaca Dos, plot 1                  | HCC-21    | 0.04 ha subplots        | 1              | -14.5    | -60.7     |
| Amazon    | Bolivia | Huanchaca Dos, plot 2                  | HCC-22    | 0.04 ha subplots        | 1              | -14.5    | -60.7     |
| Amazon    | Bolivia | Isla Huanchaca, plot 1                 | HCC-23    | 0.04 ha subplots        | 1              | -14.6    | -60.7     |
| Amazon    | Bolivia | Los Fierros Bosque I                   | LFB-01    | 0.04 ha subplots        | 1              | -14.6    | -60.8     |
| Amazon    | Bolivia | Los Fierros Bosque II                  | LFB-02    | 0.04 ha subplots        | 1              | -14.6    | -60.8     |
| Amazon    | Bolivia | Las Londras, plot 1                    | LSL-01    | 0.04 ha subplots        | 1              | -14.4    | -61.1     |
| Amazon    | Bolivia | Las Londras, plot 2                    | LSL-02    | 0.04 ha subplots        | 1              | -14.4    | -61.1     |
| Amazon    | Bolivia | Mabet plot 1                           | MBT-01    | mapped                  | 1              | -10.1    | -65.9     |
| Amazon    | Bolivia | Mabet plot 4                           | MBT-04    | mapped                  | 1              | -10.3    | -65.6     |
| Amazon    | Bolivia | Mabet plot 5                           | MBT-05    | mapped                  | 1              | -10.0    | -65.6     |
| Amazon    | Bolivia | Mabet plot 6                           | MBT-06    | mapped                  | 1              | -10.0    | -65.6     |
| Amazon    | Bolivia | Mabet plot 7                           | MBT-07    | mapped                  | 1              | -9.9     | -65.7     |
| Amazon    | Bolivia | Mabet plot 8                           | MBT-08    | mapped                  | 1              | -9.9     | -65.8     |
| Amazon    | Bolivia | Ottavio Ranch, Bolivia, plot 1, forest | OTT-01    | mapped                  | 1              | -16.4    | -61.2     |
| Amazon    | Bolivia | Reserva El Tigre 05                    | RET-05    | mapped                  | 1              | -11.0    | -65.7     |
| Amazon    | Bolivia | Reserva El Tigre 06                    | RET-06    | mapped                  | 1              | -11.0    | -65.7     |
| Amazon    | Bolivia | Reserva El Tigre 08                    | RET-08    | mapped                  | 1              | -11.0    | -65.7     |
| Amazon    | Bolivia | Reserva El Tigre 09                    | RET-09    | mapped                  | 1              | -11.0    | -65.7     |
| Amazon    | Bolivia | Sacta plot 1                           | SCT-01    | 0.04 ha subplots        | 1              | -17.1    | -64.8     |
| Amazon    | Bolivia | Sacta plot 6                           | SCT-06    | mapped                  | 1              | -17.1    | -64.8     |
| Amazon    | Bolivia | Tucavaca plot 1, forest                | TUC-01    | 0.04 ha subplots        | 1              | -18.5    | -60.8     |
| Amazon    | Brazil  | Alta Floresta plot 1                   | ALF-01    | 0.04 ha subplots        | 1              | -9.6     | -55.9     |
| Amazon    | Brazil  | Alta Floresta plot 2                   | ALF-02    | mapped                  | 1              | -9.6     | -55.9     |
| Amazon    | Brazil  | BDFFP, 2303 Dimona 5-6                 | BDF-01    | 0.04 ha subplots        | 2              | -2.3     | -60.1     |
| Amazon    | Brazil  | BDFFP, 1101 Gaviao                     | BDF-03    | 0.04 ha subplots        | 1              | -2.4     | -59.9     |

|        |               |                                                       |        |                  |      |       |       |
|--------|---------------|-------------------------------------------------------|--------|------------------|------|-------|-------|
| Amazon | Brazil        | BDFFP, 1102 Gaviao                                    | BDF-04 | 0.04 ha subplots | 1    | -2.4  | -59.9 |
| Amazon | Brazil        | BDFFP, 1103 Gaviao                                    | BDF-05 | 0.04 ha subplots | 1    | -2.4  | -59.9 |
| Amazon | Brazil        | BDFFP, 1201 Gaviao                                    | BDF-06 | 0.04 ha subplots | 3    | -2.4  | -59.9 |
| Amazon | Brazil        | BDFFP, 1105 Gaviao                                    | BDF-07 | 0.04 ha subplots | 1    | -2.4  | -59.9 |
| Amazon | Brazil        | BDFFP, 1109 Gaviao                                    | BDF-08 | 0.04 ha subplots | 1    | -2.4  | -59.9 |
| Amazon | Brazil        | BDFFP, 1113 Florestal                                 | BDF-09 | 0.04 ha subplots | 1    | -2.4  | -59.8 |
| Amazon | Brazil        | BDFFP, 1301 Florestal<br>1= plot 1301.1 and<br>1301.3 | BDF-10 | 0.04 ha subplots | 2    | -2.4  | -59.9 |
| Amazon | Brazil        | BDFFP, 1301 Florestal<br>2= plots 1301.4,5,6          | BDF-11 | 0.04 ha subplots | 3    | -2.4  | -59.8 |
| Amazon | Brazil        | BDFFP, 1301 Florestal<br>3=plots 1301.7,8             | BDF-12 | 0.04 ha subplots | 2    | -2.4  | -59.9 |
| Amazon | Brazil        | BDFFP, 3402 Cabo<br>Frio                              | BDF-13 | 0.04 ha subplots | 9    | -2.4  | -59.9 |
| Amazon | Brazil        | BDFFP, 3304 Porto<br>Alegre                           | BDF-14 | 0.04 ha subplots | 1    | -2.4  | -60.0 |
| Amazon | Brazil        | Bionte 1                                              | BNT-01 | mapped           | 1    | -2.6  | -60.2 |
| Amazon | Brazil        | Bionte 02                                             | BNT-02 | mapped           | 1    | -2.6  | -60.2 |
| Amazon | Brazil        | Bionte 4                                              | BNT-04 | mapped           | 1    | -2.6  | -60.2 |
| Amazon | Brazil        | TORRE Caxiuana                                        | CAX-06 | 0.04 ha subplots | 1    | -1.7  | -51.5 |
| Amazon | Brazil        | Caxiuana Terra Preta                                  | CAX-08 | 0.04 ha subplots | 1    | -1.8  | -51.5 |
| Amazon | Brazil        | Jacaranda, norte-sul<br>(north-south), plots 1-5      | JAC-01 | 0.04 ha subplots | 5    | -2.6  | -60.2 |
| Amazon | Brazil        | Jacaranda, leste-oeste<br>(east-west), plots 6-10     | JAC-02 | 0.04 ha subplots | 5    | -2.6  | -60.2 |
| Amazon | Brazil        | RESEX Chico Mendes:<br>Seringal Porongaba 1           | POR-01 | 0.04 ha subplots | 1    | -10.8 | -68.8 |
| Amazon | Brazil        | RESEX Chico Mendes:<br>Seringal Porongaba 2           | POR-02 | 0.04 ha subplots | 1    | -10.8 | -68.8 |
| Amazon | Brazil        | Alto Jurua                                            | RST-01 | 0.04 ha subplots | 1    | -9.0  | -72.3 |
| Amazon | Colombia      | Amacayacu: Agua<br>Pudre E                            | AGP-01 | 0.04 ha subplots | 1    | -3.7  | -70.3 |
| Amazon | Colombia      | Amacayacu: Agua<br>Pudre U                            | AGP-02 | 0.04 ha subplots | 1    | -3.7  | -70.3 |
| Amazon | Colombia      | Reserva Kalashe 1                                     | KAL-01 | 0.04 ha subplots | 1    | 11.2  | -74.1 |
| Amazon | Colombia      | Amacayacu: Lorena E                                   | LOR-01 | 0.04 ha subplots | 1    | -3.1  | -70.0 |
| Amazon | Colombia      | Amacayacu: Lorena U<br>subplot 1-13                   | LOR-02 | 0.04 ha subplots | 0.52 | -3.1  | -70.0 |
| Amazon | Ecuador       | Jatun Sacha 2                                         | JAS-02 | 0.04 ha subplots | 1    | -1.1  | -77.6 |
| Amazon | Ecuador       | Jatun Sacha 3                                         | JAS-03 | 0.04 ha subplots | 1    | -1.1  | -77.6 |
| Amazon | Ecuador       | Jatun Sacha 4 Full plot                               | JAS-04 | 0.04 ha subplots | 0.96 | -1.1  | -77.6 |
| Amazon | Ecuador       | Jatun Sacha 5, till 2002                              | JAS-05 | 0.04 ha subplots | 1    | -1.1  | -77.6 |
| Amazon | Ecuador       | Tiputini 1                                            | TIP-01 | 0.04 ha subplots | 1    | -0.7  | -76.4 |
| Amazon | Ecuador       | Tiputini 2                                            | TIP-02 | 0.04 ha subplots | 0.8  | -0.6  | -76.1 |
| Amazon | Ecuador       | Tiputini 3                                            | TIP-03 | mapped           | 1    | -0.6  | -76.2 |
| Amazon | French Guiana | Nouragues Grand<br>Plateau 11L                        | NOU-02 | mapped           | 1    | 4.1   | -52.7 |
| Amazon | French Guiana | Nouragues Grand<br>Plateau 12L                        | NOU-03 | mapped           | 1    | 4.1   | -52.7 |
| Amazon | French Guiana | Nouragues Grand<br>Plateau 17L                        | NOU-08 | mapped           | 1    | 4.1   | -52.7 |

|        |               |                                         |        |                  |      |       |       |
|--------|---------------|-----------------------------------------|--------|------------------|------|-------|-------|
| Amazon | French Guiana | Nouragues Grand Plateau 19L             | NOU-10 | mapped           | 1    | 4.1   | -52.7 |
| Amazon | French Guiana | Nouragues Petit Plateau 20H             | NOU-11 | mapped           | 1    | 4.1   | -52.7 |
| Amazon | Guyana        | Forest reserve Mabura hill 01           | FMH-01 | mapped           | 1    | 5.2   | -58.7 |
| Amazon | Guyana        | Forest reserve Mabura hill 01           | FMH-03 | mapped           | 1    | 5.2   | -58.7 |
| Amazon | Guyana        | Pibiri 05                               | PIB-05 | mapped           | 1    | 5.0   | -58.6 |
| Amazon | Guyana        | Pibiri 06                               | PIB-06 | mapped           | 1    | 5.0   | -58.6 |
| Amazon | Guyana        | Pibiri 12                               | PIB-12 | mapped           | 1    | 5.0   | -58.6 |
| Amazon | Peru          | Altos de Maizal                         | ALM-01 | mapped           | 2    | -11.8 | -71.5 |
| Amazon | Peru          | Allpahuayo A                            | ALP-01 | 0.04 ha subplots | 1    | -3.9  | -73.4 |
| Amazon | Peru          | Allpahuayo B                            | ALP-02 | 0.04 ha subplots | 1    | -4.0  | -73.4 |
| Amazon | Peru          | Allpahuayo C                            | ALP-30 | mapped           | 1    | -4.0  | -73.4 |
| Amazon | Peru          | Allpahuayo D                            | ALP-40 | mapped           | 1    | -3.9  | -73.4 |
| Amazon | Peru          | Cuzco Amazonico, CUZAM1E                | CUZ-01 | 0.04 ha subplots | 1    | -12.5 | -69.1 |
| Amazon | Peru          | Cuzco Amazonico, CUZAM1U                | CUZ-02 | 0.04 ha subplots | 1    | -12.5 | -69.1 |
| Amazon | Peru          | Cuzco Amazonico, CUZAM2E                | CUZ-03 | 0.04 ha subplots | 1    | -12.5 | -69.1 |
| Amazon | Peru          | Cuzco Amazonico, CUZAM2U                | CUZ-04 | 0.04 ha subplots | 1    | -12.5 | -69.1 |
| Amazon | Peru          | Jenaro Herrera A Terraza Alta           | JEN-11 | mapped           | 1    | -4.9  | -73.6 |
| Amazon | Peru          | Jenaro Herrera B Varillal               | JEN-12 | 0.04 ha subplots | 1    | -4.9  | -73.6 |
| Amazon | Peru          | Jacaratia Los Amigos                    | LAS-02 | mapped           | 1    | -12.6 | -70.1 |
| Amazon | Peru          | Manu, alluvial Cocha Cashu Trail 3, M1  | MNU-01 | mapped           | 2.25 | -11.9 | -71.4 |
| Amazon | Peru          | Manu, terra firme terrace, M3           | MNU-03 | mapped           | 2    | -11.9 | -71.4 |
| Amazon | Peru          | Manu, terra firme ravine, M4            | MNU-04 | mapped           | 1    | -11.9 | -71.4 |
| Amazon | Peru          | Manu, alluvial Cocha Cashu Trail 12     | MNU-05 | mapped           | 2    | -11.9 | -71.4 |
| Amazon | Peru          | Manu, alluvial Cocha Cashu Trail 2 & 31 | MNU-06 | mapped           | 2.25 | -11.9 | -71.4 |
| Amazon | Peru          | Cocha Salvador Manu, mature floodplain  | MNU-08 | mapped           | 2    | -12.0 | -71.2 |
| Amazon | Peru          | Sucusari A                              | SUC-01 | 0.04 ha subplots | 1    | -3.3  | -72.9 |
| Amazon | Peru          | Sucusari B                              | SUC-02 | 0.04 ha subplots | 1    | -3.2  | -72.9 |
| Amazon | Peru          | Sucusari C                              | SUC-03 | 0.04 ha subplots | 1    | -3.2  | -72.9 |
| Amazon | Peru          | Sucusari D                              | SUC-04 | mapped           | 1    | -3.3  | -72.9 |
| Amazon | Peru          | Sucusari E                              | SUC-05 | mapped           | 1    | -3.3  | -72.9 |
| Amazon | Peru          | Tambopata plot zero                     | TAM-01 | 0.04 ha subplots | 1    | -12.8 | -69.3 |
| Amazon | Peru          | Tambopata plot one                      | TAM-02 | 0.04 ha subplots | 1    | -12.8 | -69.3 |
| Amazon | Peru          | Tambopata plot three                    | TAM-05 | 0.04 ha subplots | 1    | -12.8 | -69.3 |
| Amazon | Peru          | Tambopata plot six                      | TAM-07 | 0.04 ha subplots | 1    | -12.8 | -69.3 |
| Amazon | Peru          | Tambopata plot seven                    | TAM-08 | 0.04 ha subplots | 1    | -12.8 | -69.3 |
| Amazon | Venezuela     | El Dorado, KM93, plotG1, ED1            | ELD-01 | mapped           | 0.25 | 6.1   | -61.4 |

|        |           |                                    |        |                  |      |      |       |
|--------|-----------|------------------------------------|--------|------------------|------|------|-------|
| Amazon | Venezuela | El Dorado, KM93,<br>plotG2, ED1    | ELD-02 | mapped           | 0.25 | 6.1  | -61.4 |
| Africa | Cameroon  | Bissombo 1                         | BIS-01 | mapped           | 1    | 3.3  | 12.5  |
| Africa | Cameroon  | Bissombo 2                         | BIS-02 | mapped           | 1    | 3.3  | 12.5  |
| Africa | Cameroon  | Bissombo 3                         | BIS-03 | mapped           | 1    | 3.3  | 12.5  |
| Africa | Cameroon  | Bissombo 4                         | BIS-04 | mapped           | 1    | 3.3  | 12.5  |
| Africa | Cameroon  | Bissombo 5                         | BIS-05 | mapped           | 1    | 3.3  | 12.5  |
| Africa | Cameroon  | Bissombo 6                         | BIS-06 | mapped           | 1    | 3.3  | 12.5  |
| Africa | Cameroon  | Campo Ma'an 1                      | CAM-01 | 0.04 ha subplots | 1    | 2.4  | 9.9   |
| Africa | Cameroon  | Campo Ma'an 2                      | CAM-02 | 0.04 ha subplots | 1    | 2.3  | 9.9   |
| Africa | Cameroon  | Campo Ma'an 3                      | CAM-03 | 0.04 ha subplots | 1    | 2.4  | 9.9   |
| Africa | Cameroon  | Dja Somolomo 1                     | DJK-01 | mapped           | 1    | 3.3  | 12.7  |
| Africa | Cameroon  | Dja Somolomo 2                     | DJK-02 | mapped           | 1    | 3.3  | 12.7  |
| Africa | Cameroon  | Dja Somolomo 3                     | DJK-03 | mapped           | 1    | 3.4  | 12.7  |
| Africa | Cameroon  | Dja Somolomo 4                     | DJK-04 | mapped           | 1    | 3.4  | 12.7  |
| Africa | Cameroon  | Dja Somolomo 5                     | DJK-05 | mapped           | 1    | 3.3  | 12.8  |
| Africa | Cameroon  | Dja Somolomo 6                     | DJK-06 | mapped           | 1    | 3.3  | 12.8  |
| Africa | Cameroon  | Edjagham, plot 4                   | EJA-04 | 0.04 ha subplots | 1    | 5.7  | 9.0   |
| Africa | Cameroon  | Edjagham, plot 5                   | EJA-05 | 0.04 ha subplots | 1    | 5.7  | 9.0   |
| Africa | Cameroon  | Nguti plot 1                       | NGI-01 | mapped           | 1    | 5.3  | 9.5   |
| Africa | Cameroon  | Nguti plot 2                       | NGI-02 | mapped           | 1    | 5.3  | 9.5   |
| Africa | Cameroon  | Nguti plot 3                       | NGI-03 | mapped           | 1    | 5.4  | 9.6   |
| Africa | Gabon     | Lope Reitsma                       | LOP-01 | mapped           | 1    | -0.2 | 11.4  |
| Africa | Gabon     | Monts de Cristal, plot 2           | MDC-02 | mapped           | 1    | 0.6  | 10.4  |
| Africa | Gabon     | Monts de Cristal, plot 3           | MDC-03 | mapped           | 1    | 0.6  | 10.4  |
| Africa | Gabon     | Monts de Cristal, plot 4           | MDC-04 | mapped           | 1    | 0.5  | 10.3  |
| Africa | Ghana     | Asenanyo F.R. 2                    | ASN-02 | mapped           | 0.6  | 6.6  | -2.2  |
| Africa | Ghana     | Asenanyo F.R. 4                    | ASN-04 | mapped           | 0.92 | 6.5  | -2.2  |
| Africa | Ghana     | Cape Three Points Plot<br>9        | CAP-09 | mapped           | 1    | 4.9  | -2.0  |
| Africa | Ghana     | Cape Three Points Plot<br>10       | CAP-10 | mapped           | 1    | 4.8  | -2.0  |
| Africa | Ghana     | Dadieso 3, occasionally<br>flooded | DAD-31 | 0.04 ha subplots | 0.56 | 6.0  | -3.0  |
| Africa | Ghana     | Dadieso 4, terra firme             | DAD-42 | mapped           | 0.72 | 6.0  | -3.0  |
| Africa | Ghana     | Fure Headwaters 7                  | FUR-07 | mapped           | 1    | 5.6  | -2.4  |
| Africa | Liberia   | Cavalla 1                          | CVL-01 | mapped           | 1    | 6.2  | -8.2  |
| Africa | Liberia   | Cavalla 8                          | CVL-08 | mapped           | 1    | 6.2  | -8.2  |
| Africa | Liberia   | Cavalla 10                         | CVL-10 | mapped           | 1    | 6.2  | -8.2  |
| Africa | Liberia   | Cavalla 11                         | CVL-11 | mapped           | 1    | 6.2  | -8.2  |
| Africa | Liberia   | Grebo F.R.1                        | GBO-01 | mapped           | 1    | 5.4  | -7.6  |
| Africa | Liberia   | Grebo F.R.2                        | GBO-02 | mapped           | 1    | 5.4  | -7.6  |
| Africa | Liberia   | Grebo F.R.3                        | GBO-03 | mapped           | 1    | 5.4  | -7.6  |
| Africa | Liberia   | Grebo F.R.4                        | GBO-04 | mapped           | 1    | 5.4  | -7.6  |
| Africa | Liberia   | Grebo F.R.8                        | GBO-08 | mapped           | 1    | 5.4  | -7.6  |
| Africa | Liberia   | Grebo F.R.10                       | GBO-10 | mapped           | 1    | 5.4  | -7.6  |
| Africa | Liberia   | Grebo F.R.11                       | GBO-11 | mapped           | 1    | 5.4  | -7.6  |
| Africa | Liberia   | Grebo F.R.13                       | GBO-13 | mapped           | 1    | 5.4  | -7.6  |
| Africa | Liberia   | Grebo F.R.14                       | GBO-14 | mapped           | 1    | 5.4  | -7.6  |
| Africa | Liberia   | Grebo F.R.15                       | GBO-15 | mapped           | 1    | 5.4  | -7.6  |

|        |          |              |        |                  |   |      |      |
|--------|----------|--------------|--------|------------------|---|------|------|
| Africa | Liberia  | Grebo F.R.16 | GBO-16 | mapped           | 1 | 5.4  | -7.6 |
| Africa | Liberia  | Grebo F.R.18 | GBO-18 | mapped           | 1 | 5.4  | -7.6 |
| Africa | Liberia  | Grebo F.R.19 | GBO-19 | mapped           | 1 | 5.4  | -7.6 |
| Africa | Tanzania | VTA-ARM-1    | VTA-01 | 0.04 ha subplots | 1 | -7.8 | 37.0 |

**Table S2.** Comparison of individual-based tree growth and mortality models with and without effects of competition for 151 plots in Amazonia and tropical Africa. Effects of neighborhood crowding were expressed as the basal area of neighbor trees per 0.04 ha subplot ( $BA_{neigh}$ ). Models were compared based on the Watanabe-Akaike Information Criterion (WAIC), with the difference from the best model ( $\Delta WAIC$ ) shown. Best models are indicated in bold.

| Competition index | Amazon        |               | Africa        |               |
|-------------------|---------------|---------------|---------------|---------------|
|                   | growth        | mortality     | growth        | mortality     |
|                   | $\Delta WAIC$ | $\Delta WAIC$ | $\Delta WAIC$ | $\Delta WAIC$ |
| none              | 5942          | 2310          | 913           | <b>0</b>      |
| $BA_{neigh}$      | <b>0</b>      | <b>0</b>      | <b>0</b>      | 98            |

**Table S3.** Correlations (Pearson's  $r$ ) between the plot-level strength of competition ( $C_{plot}$ ), climatic water deficit (CWD), total exchange bases (TEB), plot basal area (BA), plot wood density (WD), and mean tree size in Amazonia ( $n = 102$  plots) and tropical Africa ( $n = 49$  plots).

|                 | $C_{plot}$ | CWD   | TEB   | Plot BA | Plot WD |
|-----------------|------------|-------|-------|---------|---------|
| <b>Amazonia</b> |            |       |       |         |         |
| CWD             | 0.58       |       |       |         |         |
| TEB             | -0.20      | 0.12  |       |         |         |
| Plot BA         | 0.84       | 0.54  | -0.09 |         |         |
| Plot WD         | 0.53       | 0.12  | -0.48 | 0.12    |         |
| Mean tree size  | 0.31       | 0.17  | -0.18 | 0.56    | 0.13    |
| <b>Africa</b>   |            |       |       |         |         |
| CWD             | 0.05       |       |       |         |         |
| TEB             | 0.14       | 0.07  |       |         |         |
| Plot BA         | 0.86       | 0.16  | 0.12  |         |         |
| Plot WD         | 0.04       | -0.01 | 0.11  | 0.36    |         |
| Mean tree size  | 0.10       | 0.06  | -0.17 | 0.49    | 0.51    |

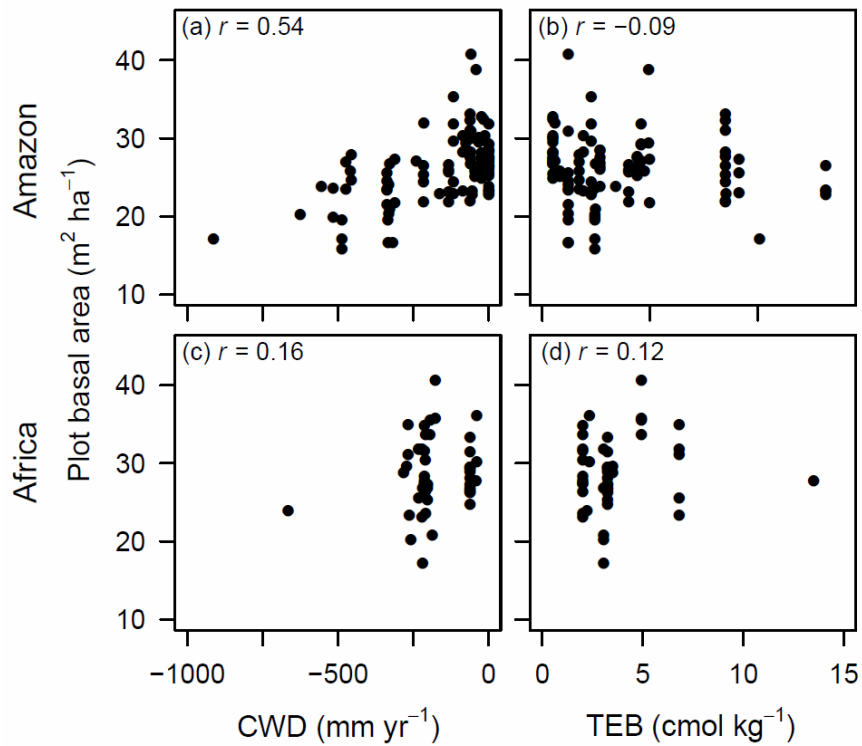

**Fig. S1.** Plot basal area across gradients in climatic water deficit (CWD) and soil total exchange bases (TEB) in the Amazon ( $n = 102$  plots) and tropical Africa ( $n = 49$  plots). Pearson's correlation coefficients ( $r$ ) are indicated.
